# Supplementary material for: Low-voltage polymer monolayer transistors for high-gain unipolar and complementary logic inverters
Source: Royal Society of Chemistry journal article supplement (doi:10.1039/d4tc01715c), 2024-01-01
Supplement: d4tc01715c1.pdf [file d4tc01715c1.pdf]

## Electronic Supplementary Material

### Low-Voltage Polymer Monolayer Transistors for High-Gain Unipolar and Complementary Logic Inverters

*Miao Cheng<sup>a,b†</sup>, Yanqin Zhang<sup>a†</sup>, Lei Zheng<sup>a†</sup>, Jianwei Zhang<sup>c</sup>, Yifan Xie<sup>a</sup>, Qingqing Jin<sup>a</sup>, Yue Tian<sup>a</sup>, Jinyao Wang<sup>a</sup>, Hongmei Xiao<sup>d</sup>, Chunmeng Dou<sup>a</sup>, Zhenzhong Yang<sup>c</sup>, Mengmeng Li<sup>a,b\*</sup>, Ling Li<sup>a</sup>, Ming Liu<sup>a</sup>*

<sup>a</sup>Key Lab of Fabrication Technologies for Integrated Circuits, Institute of Microelectronics, Chinese Academy of Sciences, Beijing 100029, China.

<sup>b</sup>University of Chinese Academy of Sciences, 100049 Beijing, China.

<sup>c</sup>Key Laboratory of Polar Materials and Devices (MOE) and Department of Electronics, East China Normal University, 200241 Shanghai, China.

<sup>d</sup>Key Laboratory of Science and Technology on Space Energy Conversion, Technical Institute of Physics and Chemistry, Chinese Academy of Sciences, Beijing 100190, China

<sup>†</sup>Contributed equally to this work.

\*Email: limengmeng@ime.ac.cn

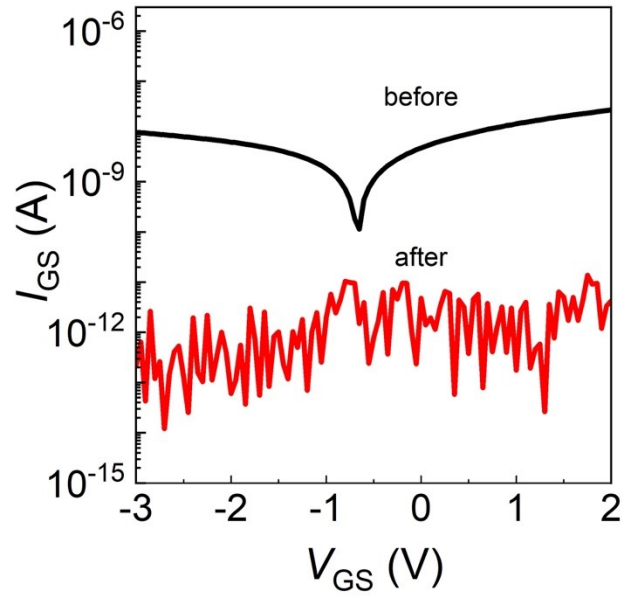

**Figure S1** The gate leakage currents ( $I_{GS}$ ) of polymer monolayer TFTs before and after patterning using the sacrificial layer strategy.

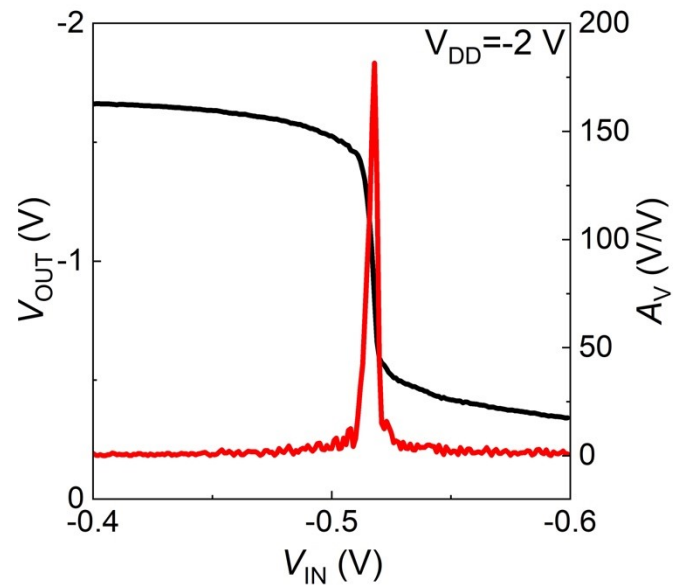

**Figure S2** Input-output characteristics and voltage gain of zero- $V_{GS}$ -load inverter based on polymer monolayer TFTs at  $V_{DD} = -2$  V.

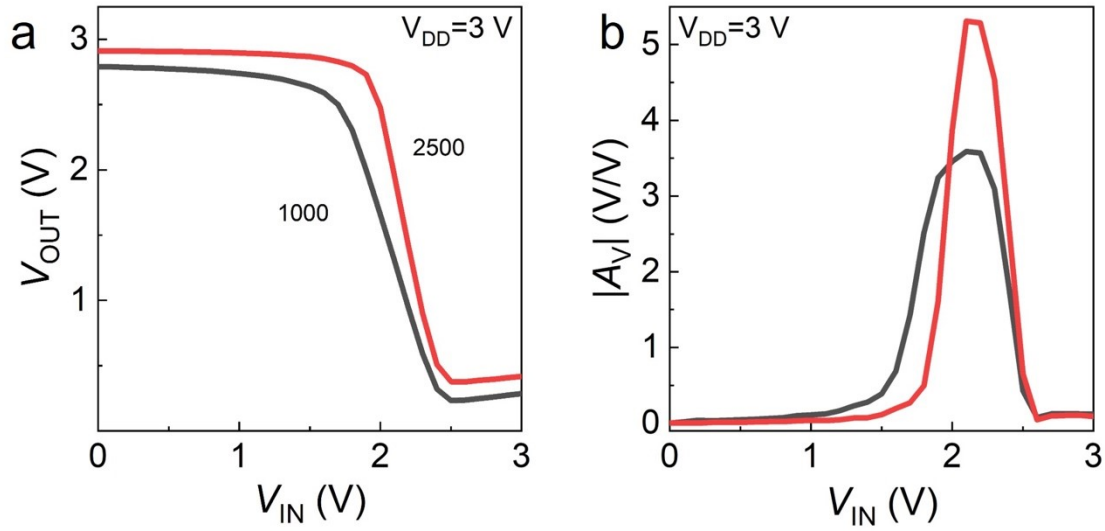

**Figure S3** Influence of channel width of driver transistor on the performance of diode-load inverters. The channel width of driver transistor is 1000 and 2500  $\mu\text{m}$  in this figure and 5000  $\mu\text{m}$  in Fig. 4b.

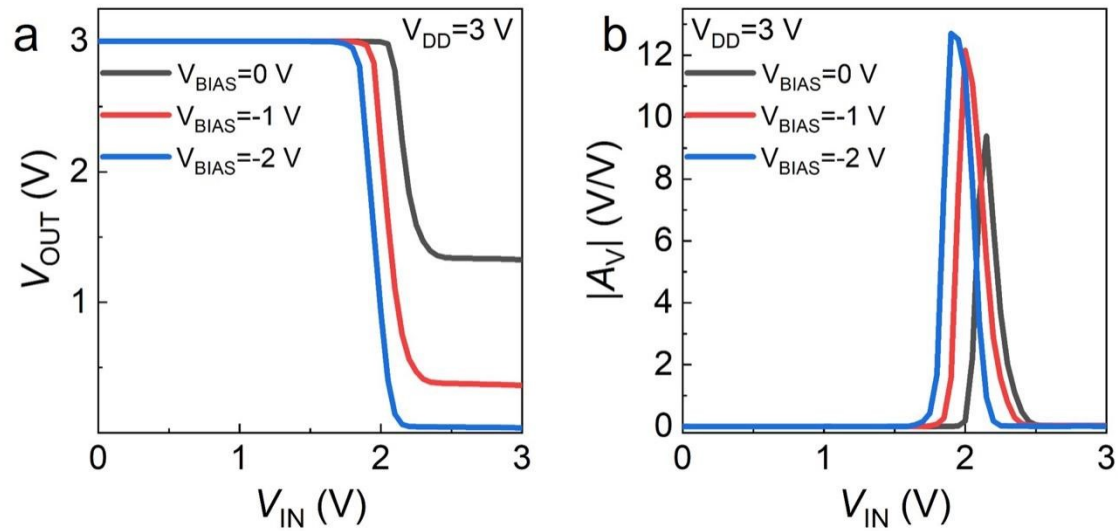

**Figure S4** Influence of channel width of bias voltage ( $V_{\text{BIAS}}$ ) on the performance of pseudo-E inverters. The bias voltage is -1 and -2 V in this figure and -3 V in Fig. 4e.

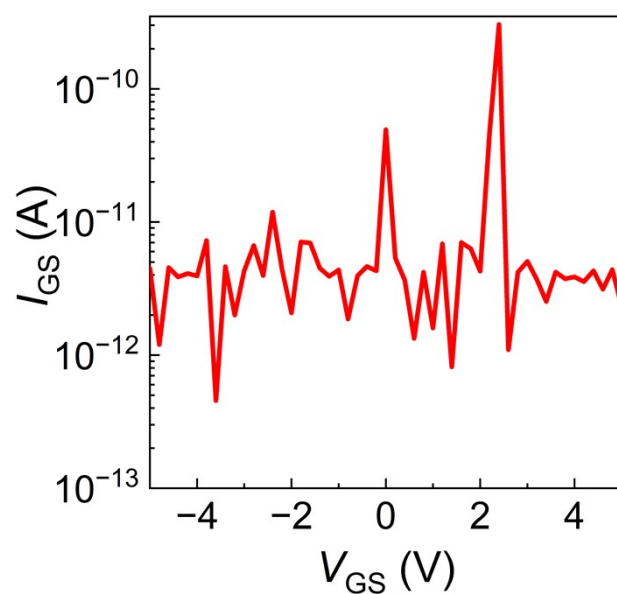

**Figure S5** The gate leakage currents ( $I_{GS}$ ) of IGZO TFTs after patterning

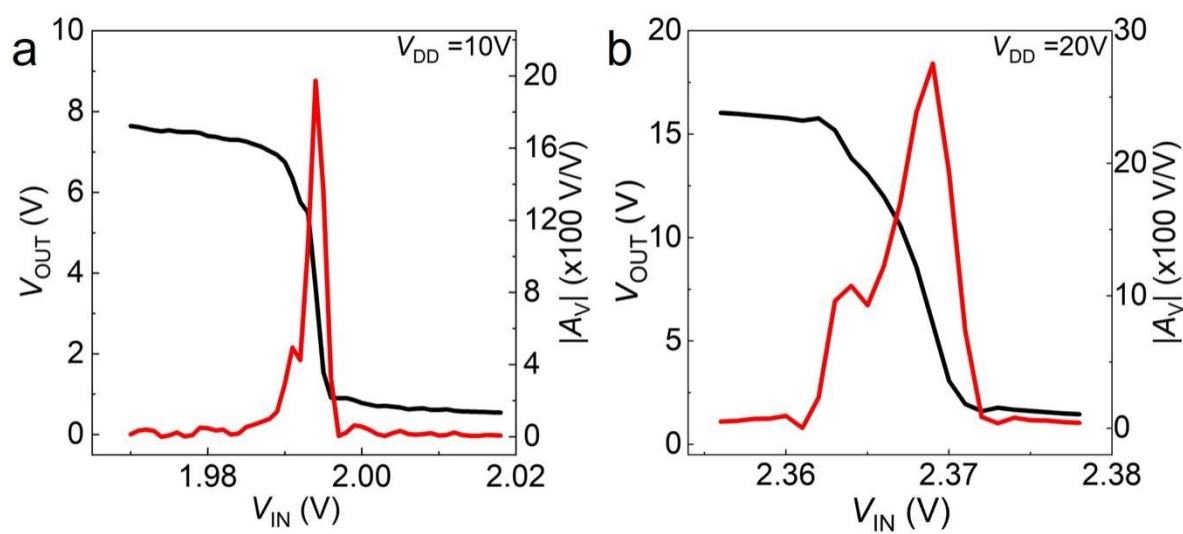

**Figure S6** Input-output characteristics of complementary inverter at various  $V_{DD}$ .

**Table S1** Channel dimension of TFTs reported in this work.

| channel dimension                    |            | channel length ( $\mu\text{m}$ ) | channel width ( $\mu\text{m}$ ) | number of TFTs |
|--------------------------------------|------------|----------------------------------|---------------------------------|----------------|
| polymer monolayer TFT                |            | 20                               | 1000                            | -              |
| IGZO TFT                             |            | 10                               | 20                              | -              |
| zero- $V_{\text{GS}}$ -load inverter | driver TFT | 5                                | 90                              | 2              |
|                                      | load TFT   | 5                                | 180                             |                |
| diode-load inverter                  | driver TFT | 5                                | 5000                            | 2              |
|                                      | load TFT   | 5                                | 20                              |                |
| Pseudo-E inverter                    | driver TFT | 5                                | 5000                            | 4              |
|                                      | load TFT   | 5                                | 20                              |                |
